# Supplementary material for: Drug binding rate regulates the properties of polysaccharide prodrugs
Source: Royal Society of Chemistry journal article supplement (doi:10.1039/c6tb00991c), 2016-01-01
Supplement: c6tb00991c1.pdf [file c6tb00991c1.pdf]

## Electronic Supplementary Information

### **Drug binding rate regulates properties of polysaccharide prodrugs**

Di Li,<sup>a</sup> Jianxun Ding,<sup>\*b</sup> Xiuli Zhuang,<sup>b</sup> Li Chen<sup>\*a</sup> and Xuesi Chen<sup>b</sup>

<sup>a</sup> Department of Chemistry, Northeast Normal University, Changchun 130024, P. R. China. \*E-mail: chenl686@nenu.edu.cn; Fax: +86 431 85099668; Tel: +86 431 85099667

<sup>b</sup> Key Laboratory of Polymer Ecomaterials, Changchun Institute of Applied Chemistry, Chinese Academy of Sciences, Changchun 130022, P. R. China. \*E-mail: jxding@ciac.ac.cn; Fax: +86 431 85262116; Tel: +86 431 85262116

## Tissue response evaluations

The 4 – 5 weeks old female BALB/c mice were used in the assessments. HES and HES-CHO were dissolved in phosphate-buffered saline (PBS) at concentrations of 1.0, 10.0, and 50.0 mg mL<sup>-1</sup> and injected into the tibialis anterior muscles in the mice. The muscles that received the injections were isolated 1 week later, fixed in 4% (W/V) paraformaldehyde, washed, and embedded in paraffin. Tissue sections were cut into about 5.0 mm thick slices, which were placed onto gelatin-coated slides and stained with hematoxylin and eosin (H&E) for histological examinations. The normal muscle without injection was used as control.

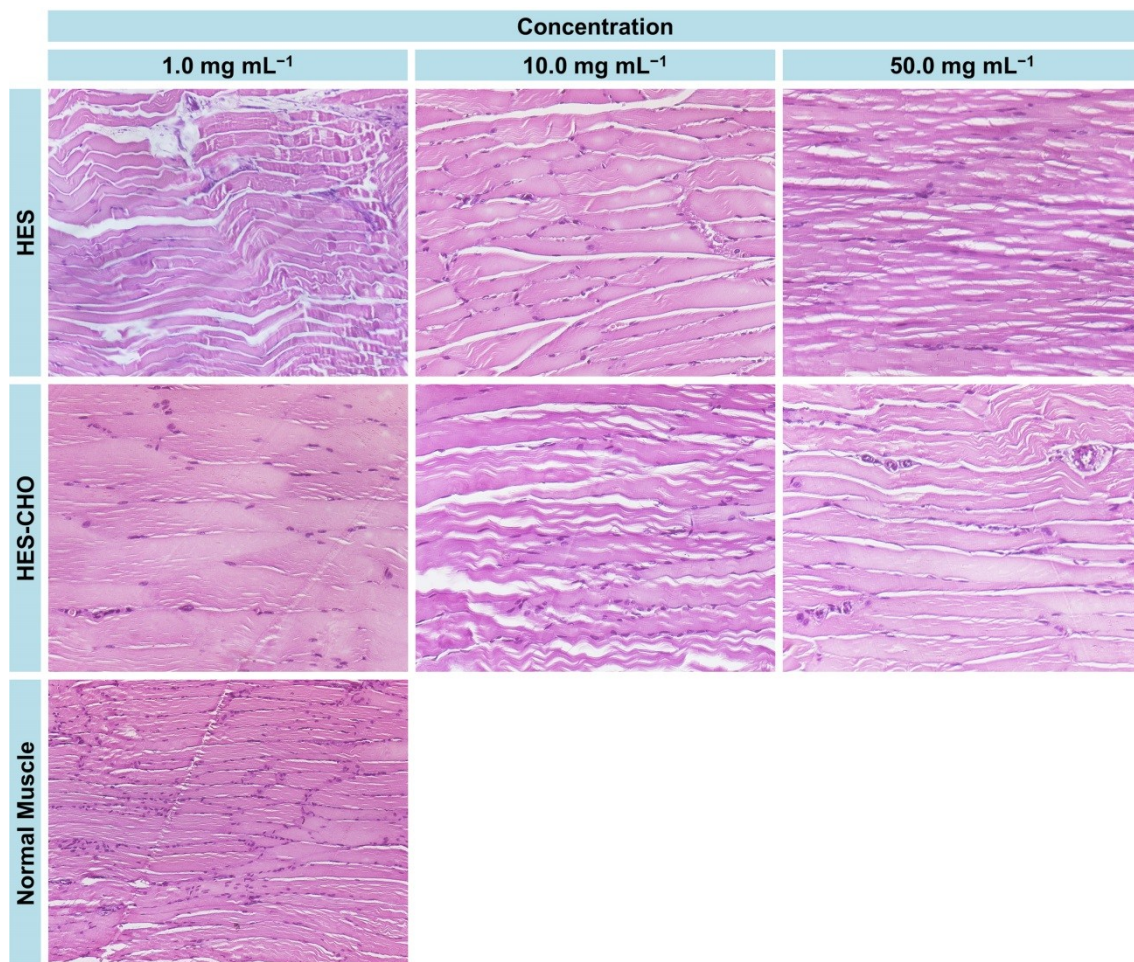

**Fig. S1** Tissue responses after intramuscular injections of HES and HES-CHO. The normal muscle without injection was used as control. Tissue sections were analyzed by H&E staining after 1 week post-injection. Magnification: 200 ×.
